# Supplementary material
Source: Springer Nature journal article supplement (https://www.springermedizin.de/resource/supplementary/12961_2012_279_MOESM3_ESM.pdf/9570948)

*Figure 3: Planning structure for the National CHA strategy*

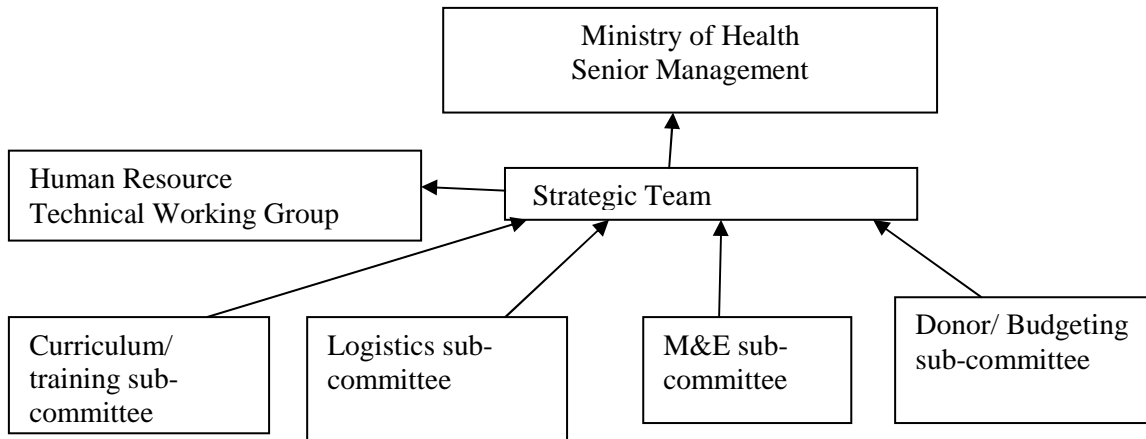

Supplement: MOESM3 [file 9570948]
